# Supplementary material for: Early Triassic S-Type Granitoids in the Qinzhou Bay Area, South China: Petrogenesis and Tectonic Implications
Source: MDPI journal article supplement (doi:10.3390/min14010022), 2023-12-24
Supplement: s1 [file s1]

Table S1 LA-ICP-MS zircon U-Pb dating results of rocks from the Qinzhou Bay Granitic Complex

| Analysis              | Th U  |     | Th/U | Isotopic ratio                       |         |                                     |         |                                     |         |                                      |         | Age (Ma)                             |     |                                     |    |                                     |    |                                      |    |
|-----------------------|-------|-----|------|--------------------------------------|---------|-------------------------------------|---------|-------------------------------------|---------|--------------------------------------|---------|--------------------------------------|-----|-------------------------------------|----|-------------------------------------|----|--------------------------------------|----|
|                       | (ppm) |     |      | <sup>207</sup> Pb/ <sup>206</sup> Pb | 1σ      | <sup>207</sup> Pb/ <sup>235</sup> U | 1σ      | <sup>206</sup> Pb/ <sup>238</sup> U | 1σ      | <sup>208</sup> Pb/ <sup>232</sup> Th | 1σ      | <sup>207</sup> Pb/ <sup>206</sup> Pb | 1σ  | <sup>207</sup> Pb/ <sup>235</sup> U | 1σ | <sup>206</sup> Pb/ <sup>238</sup> U | 1σ | <sup>208</sup> Pb/ <sup>232</sup> Th | 1σ |
| GX25, Jiuzhou granite |       |     |      |                                      |         |                                     |         |                                     |         |                                      |         |                                      |     |                                     |    |                                     |    |                                      |    |
| -01                   | 75    | 257 | 0.29 | 0.05428                              | 0.00206 | 0.28759                             | 0.01045 | 0.03872                             | 0.00045 | 0.01223                              | 0.00042 | 383                                  | 85  | 257                                 | 8  | 245                                 | 3  | 246                                  | 8  |
| -02                   | 89    | 311 | 0.29 | 0.05239                              | 0.00178 | 0.28144                             | 0.00974 | 0.03901                             | 0.00049 | 0.01191                              | 0.00035 | 302                                  | 78  | 252                                 | 8  | 247                                 | 3  | 239                                  | 7  |
| -03                   | 112   | 341 | 0.33 | 0.05158                              | 0.00191 | 0.27767                             | 0.01021 | 0.03903                             | 0.00033 | 0.01255                              | 0.00037 | 333                                  | 81  | 249                                 | 8  | 247                                 | 2  | 252                                  | 7  |
| -04                   | 113   | 431 | 0.26 | 0.05004                              | 0.00125 | 0.27331                             | 0.00686 | 0.03963                             | 0.00032 | 0.01240                              | 0.00032 | 198                                  | 27  | 245                                 | 5  | 251                                 | 2  | 249                                  | 6  |
| -05                   | 104   | 358 | 0.29 | 0.05101                              | 0.00145 | 0.27365                             | 0.00773 | 0.03908                             | 0.00036 | 0.01259                              | 0.00034 | 243                                  | 65  | 246                                 | 6  | 247                                 | 2  | 253                                  | 7  |
| -06                   | 83    | 292 | 0.28 | 0.05238                              | 0.00149 | 0.27852                             | 0.00788 | 0.03880                             | 0.00036 | 0.01176                              | 0.00032 | 302                                  | 65  | 249                                 | 6  | 245                                 | 2  | 236                                  | 6  |
| -07                   | 87    | 276 | 0.31 | 0.05212                              | 0.00185 | 0.28244                             | 0.01013 | 0.03945                             | 0.00047 | 0.01229                              | 0.00039 | 300                                  | 81  | 253                                 | 8  | 249                                 | 3  | 247                                  | 8  |
| -08                   | 62    | 246 | 0.25 | 0.05533                              | 0.00213 | 0.30417                             | 0.01613 | 0.03900                             | 0.00050 | 0.01430                              | 0.00082 | 433                                  | 82  | 270                                 | 13 | 247                                 | 3  | 287                                  | 16 |
| -09                   | 76    | 162 | 0.47 | 0.05103                              | 0.00174 | 0.27086                             | 0.00883 | 0.03884                             | 0.00035 | 0.01224                              | 0.00035 | 243                                  | 80  | 243                                 | 7  | 246                                 | 2  | 246                                  | 7  |
| -10                   | 91    | 307 | 0.30 | 0.04790                              | 0.00162 | 0.25462                             | 0.00883 | 0.03861                             | 0.00040 | 0.01190                              | 0.00033 | 95                                   | 80  | 230                                 | 7  | 244                                 | 3  | 239                                  | 7  |
| -11                   | 89    | 338 | 0.26 | 0.05210                              | 0.00125 | 0.28057                             | 0.00688 | 0.03919                             | 0.00034 | 0.01181                              | 0.00029 | 300                                  | 54  | 251                                 | 5  | 248                                 | 2  | 237                                  | 6  |
| -12                   | 71    | 313 | 0.23 | 0.05182                              | 0.00198 | 0.28270                             | 0.01179 | 0.03951                             | 0.00069 | 0.01287                              | 0.00053 | 276                                  | 87  | 253                                 | 9  | 250                                 | 4  | 258                                  | 11 |
| -13                   | 94    | 311 | 0.30 | 0.04841                              | 0.00135 | 0.26146                             | 0.00736 | 0.03930                             | 0.00044 | 0.01169                              | 0.00034 | 120                                  | 65  | 236                                 | 6  | 248                                 | 3  | 235                                  | 7  |
| -14                   | 90    | 311 | 0.29 | 0.04928                              | 0.00130 | 0.26521                             | 0.00705 | 0.03913                             | 0.00030 | 0.01213                              | 0.00033 | 161                                  | 61  | 239                                 | 6  | 247                                 | 2  | 244                                  | 7  |
| -15                   | 82    | 285 | 0.29 | 0.05133                              | 0.00174 | 0.28152                             | 0.01085 | 0.03954                             | 0.00059 | 0.01262                              | 0.00043 | 257                                  | 78  | 252                                 | 9  | 250                                 | 4  | 253                                  | 9  |
| -16                   | 64    | 308 | 0.21 | 0.05009                              | 0.00183 | 0.27071                             | 0.00984 | 0.03941                             | 0.00048 | 0.01192                              | 0.00042 | 198                                  | 81  | 243                                 | 8  | 249                                 | 3  | 239                                  | 8  |
| -17                   | 105   | 319 | 0.33 | 0.04977                              | 0.00121 | 0.26708                             | 0.00654 | 0.03901                             | 0.00029 | 0.01168                              | 0.00031 | 183                                  | 56  | 240                                 | 5  | 247                                 | 2  | 235                                  | 6  |
| -18                   | 47    | 222 | 0.21 | 0.05451                              | 0.00227 | 0.29657                             | 0.01301 | 0.03939                             | 0.00042 | 0.01335                              | 0.00054 | 391                                  | 94  | 264                                 | 10 | 249                                 | 3  | 268                                  | 11 |
| -19                   | 66    | 244 | 0.27 | 0.05688                              | 0.00137 | 0.44812                             | 0.01253 | 0.05688                             | 0.00079 | 0.02252                              | 0.00070 | 487                                  | 54  | 376                                 | 9  | 357                                 | 5  | 450                                  | 14 |
| -20                   | 92    | 404 | 0.23 | 0.05240                              | 0.00196 | 0.28433                             | 0.01028 | 0.03955                             | 0.00055 | 0.01015                              | 0.00043 | 302                                  | 85  | 254                                 | 8  | 250                                 | 3  | 204                                  | 9  |
| -21                   | 68    | 217 | 0.32 | 0.05387                              | 0.00173 | 0.28585                             | 0.00911 | 0.03866                             | 0.00039 | 0.01198                              | 0.00035 | 365                                  | 68  | 255                                 | 7  | 245                                 | 2  | 241                                  | 7  |
| -22                   | 62    | 221 | 0.28 | 0.05436                              | 0.00174 | 0.29062                             | 0.00947 | 0.03879                             | 0.00040 | 0.01201                              | 0.00040 | 387                                  | 68  | 259                                 | 7  | 245                                 | 3  | 241                                  | 8  |
| -23                   | 40    | 192 | 0.21 | 0.05216                              | 0.00227 | 0.28555                             | 0.01229 | 0.03969                             | 0.00040 | 0.01220                              | 0.00054 | 300                                  | 100 | 255                                 | 10 | 251                                 | 2  | 245                                  | 11 |

| Analysis                    | Th U  |     | Th/U | Isotopic ratio                       |         |                                     |         |                                     |         |                                      |         | Age (Ma)                             |     |                                     |    |                                     |    |                                      |    |
|-----------------------------|-------|-----|------|--------------------------------------|---------|-------------------------------------|---------|-------------------------------------|---------|--------------------------------------|---------|--------------------------------------|-----|-------------------------------------|----|-------------------------------------|----|--------------------------------------|----|
|                             | (ppm) |     |      | <sup>207</sup> Pb/ <sup>206</sup> Pb | 1σ      | <sup>207</sup> Pb/ <sup>235</sup> U | 1σ      | <sup>206</sup> Pb/ <sup>238</sup> U | 1σ      | <sup>208</sup> Pb/ <sup>232</sup> Th | 1σ      | <sup>207</sup> Pb/ <sup>206</sup> Pb | 1σ  | <sup>207</sup> Pb/ <sup>235</sup> U | 1σ | <sup>206</sup> Pb/ <sup>238</sup> U | 1σ | <sup>208</sup> Pb/ <sup>232</sup> Th | 1σ |
|                             |       |     |      |                                      |         |                                     |         |                                     |         |                                      |         |                                      |     |                                     |    |                                     |    |                                      |    |
| GX35, Dasi granite porphyry |       |     |      |                                      |         |                                     |         |                                     |         |                                      |         |                                      |     |                                     |    |                                     |    |                                      |    |
| -01                         | 69    | 248 | 0.28 | 0.05298                              | 0.00130 | 0.28359                             | 0.00698 | 0.03894                             | 0.00029 | 0.01178                              | 0.00033 | 328                                  | 25  | 253                                 | 6  | 246                                 | 2  | 237                                  | 7  |
| -02                         | 61    | 225 | 0.27 | 0.05434                              | 0.00253 | 0.28869                             | 0.01339 | 0.03870                             | 0.00047 | 0.01178                              | 0.00051 | 387                                  | 106 | 258                                 | 11 | 245                                 | 3  | 237                                  | 10 |
| -03                         | 68    | 279 | 0.24 | 0.05014                              | 0.00163 | 0.26777                             | 0.00859 | 0.03900                             | 0.00033 | 0.01165                              | 0.00035 | 211                                  | 76  | 241                                 | 7  | 247                                 | 2  | 234                                  | 7  |
| -05                         | 53    | 264 | 0.20 | 0.04872                              | 0.00192 | 0.25916                             | 0.01014 | 0.03879                             | 0.00033 | 0.01151                              | 0.00042 | 200                                  | 97  | 234                                 | 8  | 245                                 | 2  | 231                                  | 8  |
| -06                         | 97    | 250 | 0.39 | 0.04936                              | 0.00233 | 0.26315                             | 0.01255 | 0.03883                             | 0.00049 | 0.01175                              | 0.00049 | 165                                  | 111 | 237                                 | 10 | 246                                 | 3  | 236                                  | 10 |
| -07                         | 63    | 234 | 0.27 | 0.05179                              | 0.00262 | 0.27461                             | 0.01452 | 0.03848                             | 0.00055 | 0.01090                              | 0.00044 | 276                                  | 110 | 246                                 | 12 | 243                                 | 3  | 219                                  | 9  |
| -08                         | 86    | 194 | 0.45 | 0.04617                              | 0.00279 | 0.24361                             | 0.01438 | 0.03857                             | 0.00050 | 0.01062                              | 0.00039 | 6                                    | 141 | 221                                 | 12 | 244                                 | 3  | 214                                  | 8  |
| -09                         | 69    | 385 | 0.18 | 0.04996                              | 0.00201 | 0.26475                             | 0.01030 | 0.03860                             | 0.00038 | 0.01114                              | 0.00046 | 195                                  | 93  | 238                                 | 8  | 244                                 | 2  | 224                                  | 9  |
| -10                         | 172   | 523 | 0.33 | 0.04900                              | 0.00146 | 0.26143                             | 0.00790 | 0.03876                             | 0.00032 | 0.01197                              | 0.00037 | 146                                  | 70  | 236                                 | 6  | 245                                 | 2  | 241                                  | 7  |
| -11                         | 70    | 260 | 0.27 | 0.05127                              | 0.00183 | 0.27312                             | 0.00965 | 0.03890                             | 0.00041 | 0.01152                              | 0.00037 | 254                                  | 81  | 245                                 | 8  | 246                                 | 3  | 231                                  | 7  |
| -12                         | 137   | 433 | 0.32 | 0.06499                              | 0.00138 | 1.01782                             | 0.02190 | 0.11359                             | 0.00077 | 0.03722                              | 0.00092 | 774                                  | 44  | 713                                 | 11 | 694                                 | 4  | 739                                  | 18 |
| -13                         | 77    | 338 | 0.23 | 0.06545                              | 0.00180 | 0.78722                             | 0.02710 | 0.08671                             | 0.00167 | 0.02402                              | 0.00089 | 791                                  | 62  | 590                                 | 15 | 536                                 | 10 | 480                                  | 18 |
| -14                         | 60    | 240 | 0.25 | 0.04648                              | 0.00195 | 0.25013                             | 0.01011 | 0.03931                             | 0.00038 | 0.01195                              | 0.00040 | 33                                   | 87  | 227                                 | 8  | 249                                 | 2  | 240                                  | 8  |
| -15                         | 60    | 269 | 0.22 | 0.04999                              | 0.00186 | 0.26860                             | 0.00960 | 0.03933                             | 0.00039 | 0.01159                              | 0.00044 | 195                                  | 87  | 242                                 | 8  | 249                                 | 2  | 233                                  | 9  |
| -16                         | 152   | 438 | 0.35 | 0.05040                              | 0.00152 | 0.27357                             | 0.00834 | 0.03932                             | 0.00034 | 0.01201                              | 0.00032 | 213                                  | 70  | 246                                 | 7  | 249                                 | 2  | 241                                  | 6  |
| -17                         | 99    | 346 | 0.29 | 0.04929                              | 0.00168 | 0.26502                             | 0.00901 | 0.03903                             | 0.00042 | 0.01186                              | 0.00040 | 161                                  | 80  | 239                                 | 7  | 247                                 | 3  | 238                                  | 8  |
| -18                         | 65    | 244 | 0.26 | 0.05056                              | 0.00192 | 0.27270                             | 0.01032 | 0.03919                             | 0.00037 | 0.01183                              | 0.00035 | 220                                  | 87  | 245                                 | 8  | 248                                 | 2  | 238                                  | 7  |
| -19                         | 55    | 189 | 0.29 | 0.06225                              | 0.00186 | 0.62963                             | 0.02640 | 0.07244                             | 0.00189 | 0.02682                              | 0.00094 | 683                                  | 65  | 496                                 | 16 | 451                                 | 11 | 535                                  | 18 |
| -20                         | 158   | 248 | 0.64 | 0.05043                              | 0.00228 | 0.26973                             | 0.01115 | 0.03918                             | 0.00049 | 0.01156                              | 0.00033 | 213                                  | 106 | 242                                 | 9  | 248                                 | 3  | 232                                  | 7  |
| -21                         | 91    | 293 | 0.31 | 0.04930                              | 0.00142 | 0.26612                             | 0.00767 | 0.03936                             | 0.00034 | 0.01248                              | 0.00031 | 161                                  | 64  | 240                                 | 6  | 249                                 | 2  | 251                                  | 6  |
| -22                         | 41    | 584 | 0.07 | 0.05167                              | 0.00137 | 0.27436                             | 0.00703 | 0.03869                             | 0.00042 | 0.01256                              | 0.00062 | 333                                  | 61  | 246                                 | 6  | 245                                 | 3  | 252                                  | 12 |
| -23                         | 76    | 260 | 0.29 | 0.04635                              | 0.00187 | 0.24922                             | 0.01041 | 0.03908                             | 0.00054 | 0.01210                              | 0.00040 | 17                                   | 93  | 226                                 | 8  | 247                                 | 3  | 243                                  | 8  |
| -24                         | 77    | 256 | 0.30 | 0.04889                              | 0.00166 | 0.26379                             | 0.00957 | 0.03922                             | 0.00044 | 0.01226                              | 0.00036 | 143                                  | 80  | 238                                 | 8  | 248                                 | 3  | 246                                  | 7  |

| Analysis                     | Th    | U                                    | Th/U | Isotopic ratio |                                     |         |                                     |         |                                      |         |                                      | Age (Ma) |                                     |     |                                     |     |                                      |     |    |
|------------------------------|-------|--------------------------------------|------|----------------|-------------------------------------|---------|-------------------------------------|---------|--------------------------------------|---------|--------------------------------------|----------|-------------------------------------|-----|-------------------------------------|-----|--------------------------------------|-----|----|
|                              | (ppm) | <sup>207</sup> Pb/ <sup>206</sup> Pb |      | 1σ             | <sup>207</sup> Pb/ <sup>235</sup> U | 1σ      | <sup>206</sup> Pb/ <sup>238</sup> U | 1σ      | <sup>208</sup> Pb/ <sup>232</sup> Th | 1σ      | <sup>207</sup> Pb/ <sup>206</sup> Pb | 1σ       | <sup>207</sup> Pb/ <sup>235</sup> U | 1σ  | <sup>206</sup> Pb/ <sup>238</sup> U | 1σ  | <sup>208</sup> Pb/ <sup>232</sup> Th | 1σ  |    |
|                              |       |                                      |      |                |                                     |         |                                     |         |                                      |         |                                      |          |                                     |     |                                     |     |                                      |     |    |
| GX45, Taima granite porphyry |       |                                      |      |                |                                     |         |                                     |         |                                      |         |                                      |          |                                     |     |                                     |     |                                      |     |    |
| -02                          | 56    | 271                                  | 0.21 | 0.05253        | 0.00207                             | 0.28145 | 0.01076                             | 0.03895 | 0.00039                              | 0.01304 | 0.00048                              | 309      | 89                                  | 252 | 9                                   | 246 | 2                                    | 262 | 10 |
| -03                          | 85    | 241                                  | 0.35 | 0.04946        | 0.00144                             | 0.26980 | 0.00800                             | 0.03952 | 0.00036                              | 0.01230 | 0.00034                              | 169      | 67                                  | 243 | 6                                   | 250 | 2                                    | 247 | 7  |
| -04                          | 100   | 402                                  | 0.25 | 0.05049        | 0.00169                             | 0.27629 | 0.00944                             | 0.03961 | 0.00055                              | 0.01171 | 0.00040                              | 217      | 81                                  | 248 | 8                                   | 250 | 3                                    | 235 | 8  |
| -05                          | 117   | 290                                  | 0.40 | 0.04892        | 0.00158                             | 0.26680 | 0.00852                             | 0.03951 | 0.00033                              | 0.01277 | 0.00033                              | 143      | 76                                  | 240 | 7                                   | 250 | 2                                    | 257 | 7  |
| -06                          | 92    | 326                                  | 0.28 | 0.05046        | 0.00160                             | 0.27178 | 0.00839                             | 0.03913 | 0.00039                              | 0.01246 | 0.00036                              | 217      | 72                                  | 244 | 7                                   | 247 | 2                                    | 250 | 7  |
| -07                          | 120   | 416                                  | 0.29 | 0.05203        | 0.00170                             | 0.28238 | 0.00926                             | 0.03917 | 0.00039                              | 0.01257 | 0.00036                              | 287      | 76                                  | 253 | 7                                   | 248 | 2                                    | 253 | 7  |
| -08                          | 90    | 335                                  | 0.27 | 0.05170        | 0.00183                             | 0.27970 | 0.00980                             | 0.03915 | 0.00044                              | 0.01285 | 0.00040                              | 272      | 81                                  | 250 | 8                                   | 248 | 3                                    | 258 | 8  |
| -09                          | 75    | 241                                  | 0.31 | 0.04995        | 0.00217                             | 0.26567 | 0.01111                             | 0.03916 | 0.00058                              | 0.01229 | 0.00044                              | 191      | 106                                 | 239 | 9                                   | 248 | 4                                    | 247 | 9  |
| -10                          | 77    | 302                                  | 0.25 | 0.05027        | 0.00179                             | 0.27341 | 0.01001                             | 0.03913 | 0.00044                              | 0.01239 | 0.00040                              | 209      | 81                                  | 245 | 8                                   | 247 | 3                                    | 249 | 8  |
| -11                          | 74    | 280                                  | 0.26 | 0.05025        | 0.00178                             | 0.27296 | 0.00911                             | 0.03969 | 0.00040                              | 0.01278 | 0.00039                              | 206      | 83                                  | 245 | 7                                   | 251 | 2                                    | 257 | 8  |
| -12                          | 127   | 362                                  | 0.35 | 0.05095        | 0.00148                             | 0.27532 | 0.00763                             | 0.03909 | 0.00033                              | 0.01284 | 0.00033                              | 239      | 69                                  | 247 | 6                                   | 247 | 2                                    | 258 | 7  |
| -13                          | 97    | 279                                  | 0.35 | 0.04988        | 0.00160                             | 0.27211 | 0.00874                             | 0.03927 | 0.00036                              | 0.01260 | 0.00037                              | 191      | 69                                  | 244 | 7                                   | 248 | 2                                    | 253 | 7  |
| -14                          | 132   | 456                                  | 0.29 | 0.04868        | 0.00165                             | 0.26497 | 0.00875                             | 0.03926 | 0.00037                              | 0.01283 | 0.00035                              | 132      | 80                                  | 239 | 7                                   | 248 | 2                                    | 258 | 7  |
| -15                          | 91    | 322                                  | 0.28 | 0.04952        | 0.00198                             | 0.27389 | 0.01156                             | 0.03960 | 0.00050                              | 0.01301 | 0.00039                              | 172      | 94                                  | 246 | 9                                   | 250 | 3                                    | 261 | 8  |
| -16                          | 97    | 242                                  | 0.40 | 0.05003        | 0.00208                             | 0.27188 | 0.01173                             | 0.03908 | 0.00056                              | 0.01311 | 0.00043                              | 198      | 101                                 | 244 | 9                                   | 247 | 3                                    | 263 | 9  |
| -17                          | 147   | 428                                  | 0.34 | 0.04974        | 0.00159                             | 0.27097 | 0.00820                             | 0.03942 | 0.00039                              | 0.01286 | 0.00034                              | 183      | 76                                  | 243 | 7                                   | 249 | 2                                    | 258 | 7  |
| -18                          | 124   | 389                                  | 0.32 | 0.04843        | 0.00150                             | 0.26547 | 0.00806                             | 0.03953 | 0.00037                              | 0.01266 | 0.00034                              | 120      | 68                                  | 239 | 6                                   | 250 | 2                                    | 254 | 7  |
| -19                          | 78    | 270                                  | 0.29 | 0.05004        | 0.00178                             | 0.27021 | 0.00923                             | 0.03920 | 0.00043                              | 0.01269 | 0.00039                              | 198      | 77                                  | 243 | 7                                   | 248 | 3                                    | 255 | 8  |
| -20                          | 130   | 400                                  | 0.32 | 0.04743        | 0.00153                             | 0.25835 | 0.00801                             | 0.03936 | 0.00039                              | 0.01203 | 0.00033                              | 78       | 69                                  | 233 | 6                                   | 249 | 2                                    | 242 | 7  |
| -21                          | 101   | 527                                  | 0.19 | 0.04849        | 0.00140                             | 0.26416 | 0.00735                             | 0.03925 | 0.00029                              | 0.01276 | 0.00037                              | 124      | 69                                  | 238 | 6                                   | 248 | 2                                    | 256 | 7  |
| -22                          | 77    | 292                                  | 0.26 | 0.05046        | 0.00165                             | 0.27396 | 0.00887                             | 0.03913 | 0.00033                              | 0.01183 | 0.00035                              | 217      | 81                                  | 246 | 7                                   | 247 | 2                                    | 238 | 7  |
| -23                          | 111   | 446                                  | 0.25 | 0.04972        | 0.00140                             | 0.26951 | 0.00731                             | 0.03915 | 0.00034                              | 0.01205 | 0.00033                              | 189      | 67                                  | 242 | 6                                   | 248 | 2                                    | 242 | 7  |
| -24                          | 77    | 604                                  | 0.13 | 0.04898        | 0.00134                             | 0.26508 | 0.00705                             | 0.03903 | 0.00035                              | 0.01229 | 0.00037                              | 146      | 65                                  | 239 | 6                                   | 247 | 2                                    | 247 | 7  |

Table S2 LA-ICP-MS zircon trace element concentrations (ppm) of rocks from the Qinzhou Bay Granitic Complex

| Analysis              | Ti   | Sr   | Y    | Nb   | La   | Ce   | Pr   | Nd   | Sm   | Eu   | Gd   | Tb   | Dy   | Ho   | Er  | Tm   | Yb  | Lu   | Hf    | Ta   | Th   | U   | Eu/Eu* | T (°C) | ΔFMQ |
|-----------------------|------|------|------|------|------|------|------|------|------|------|------|------|------|------|-----|------|-----|------|-------|------|------|-----|--------|--------|------|
| GX25, Jiuzhou granite |      |      |      |      |      |      |      |      |      |      |      |      |      |      |     |      |     |      |       |      |      |     |        |        |      |
| -01                   | 10.3 | 0.18 | 1593 | 0.68 | 0.01 | 0.93 | 0.09 | 1.27 | 3.20 | 0.05 | 22.3 | 9.39 | 126  | 51.6 | 239 | 49.3 | 471 | 90.1 | 11500 | 0.38 | 74.7 | 257 | 0.02   | 819    | -5.4 |
| -02                   | 10.5 | 0.25 | 2467 | 0.82 | bd   | 0.88 | 0.08 | 1.12 | 4.38 | 0.07 | 37.0 | 14.8 | 207  | 79.3 | 365 | 74.1 | 686 | 127  | 11239 | 0.44 | 88.8 | 311 | 0.02   | 820    | -5.6 |
| -03                   | 10.4 | 0.33 | 1944 | 0.89 | bd   | 1.26 | 0.01 | 1.33 | 3.25 | 0.07 | 27.7 | 11.9 | 158  | 62.6 | 287 | 60.5 | 561 | 104  | 10714 | 0.64 | 112  | 341 | 0.02   | 819    | -4.3 |
| -04                   | 8.09 | 0.26 | 2474 | 0.79 | 0.03 | 1.04 | 0.05 | 1.35 | 3.85 | 0.08 | 32.6 | 14.8 | 208  | 81.3 | 386 | 79.0 | 749 | 139  | 10943 | 0.65 | 113  | 431 | 0.02   | 793    | -5.5 |
| -05                   | 7.61 | 0.21 | 1930 | 0.91 | bd   | 1.16 | 0.02 | 1.29 | 2.83 | bd   | 27.6 | 11.5 | 151  | 61.4 | 284 | 59.8 | 557 | 104  | 11273 | 0.62 | 104  | 358 | 0.00   | 787    | -5.0 |
| -06                   | 8.43 | 0.19 | 1759 | 0.79 | bd   | 0.87 | 0.07 | 0.93 | 3.41 | 0.08 | 25.2 | 9.87 | 136  | 55.7 | 264 | 54.6 | 514 | 97.2 | 11324 | 0.48 | 83.0 | 292 | 0.03   | 797    | -5.2 |
| -07                   | 9.45 | 0.16 | 1757 | 0.68 | bd   | 1.04 | 0.02 | 0.97 | 3.60 | 0.13 | 24.1 | 10.1 | 137  | 54.7 | 253 | 53.2 | 504 | 92.4 | 11299 | 0.48 | 86.5 | 276 | 0.04   | 809    | -4.6 |
| -08                   | 17.1 | 0.29 | 1526 | 0.52 | 1.38 | 1.11 | 0.06 | 1.38 | 3.14 | 0.12 | 22.4 | 9.39 | 123  | 48.1 | 216 | 45.9 | 417 | 79.4 | 11643 | 0.40 | 62.4 | 246 | 0.04   | 876    | -4.0 |
| -09                   | 17.9 | 0.16 | 1615 | 0.62 | bd   | 1.20 | 0.06 | 1.45 | 4.18 | 0.12 | 29.5 | 10.5 | 133  | 51.7 | 232 | 47.0 | 441 | 82.4 | 10655 | 0.37 | 76.2 | 162 | 0.03   | 882    | -4.5 |
| -10                   | 9.45 | 0.30 | 1899 | 0.64 | bd   | 1.03 | 0.03 | 0.59 | 3.36 | 0.05 | 24.7 | 10.8 | 149  | 60.7 | 282 | 57.5 | 541 | 103  | 11492 | 0.44 | 90.6 | 307 | 0.02   | 809    | -2.9 |
| -11                   | 7.95 | 0.23 | 2209 | 0.81 | bd   | 0.85 | 0.08 | 1.39 | 3.87 | bd   | 30.4 | 13.0 | 176  | 70.2 | 335 | 67.8 | 633 | 119  | 11834 | 0.69 | 88.7 | 338 | 0.00   | 791    | -6.7 |
| -12                   | 8.16 | 0.21 | 1895 | 1.07 | 0.02 | 1.13 | 0.01 | 0.72 | 2.78 | 0.07 | 25.8 | 11.6 | 154  | 66.2 | 298 | 63.3 | 603 | 113  | 11940 | 0.61 | 70.8 | 313 | 0.03   | 794    | -3.0 |
| -13                   | 9.70 | 0.25 | 1802 | 0.82 | 0.04 | 1.29 | 0.11 | 1.43 | 2.49 | 0.02 | 25.5 | 10.4 | 148  | 58.6 | 274 | 56.2 | 515 | 98.9 | 11755 | 0.52 | 94.4 | 311 | 0.01   | 812    | -4.1 |
| -14                   | 9.10 | 0.26 | 1888 | 0.84 | 0.01 | 0.82 | 0.04 | 0.80 | 3.62 | 0.13 | 28.1 | 11.8 | 161  | 63.3 | 296 | 61.1 | 564 | 105  | 11160 | 0.49 | 90.4 | 311 | 0.04   | 805    | -4.9 |
| -15                   | 9.26 | 0.21 | 1742 | 0.59 | 0.01 | 1.06 | 0.04 | 0.72 | 2.55 | 0.09 | 22.6 | 10.7 | 138  | 55.8 | 264 | 56.1 | 522 | 100  | 11683 | 0.59 | 82.3 | 285 | 0.04   | 807    | -2.9 |
| -16                   | 8.62 | 0.28 | 2015 | 0.50 | bd   | 0.84 | 0.08 | 0.73 | 4.76 | 0.02 | 26.2 | 11.2 | 156  | 65.9 | 325 | 67.0 | 623 | 122  | 12395 | 0.60 | 63.8 | 308 | 0.01   | 800    | -4.8 |
| -17                   | 11.6 | 0.31 | 2321 | 0.94 | bd   | 1.11 | 0.07 | 1.44 | 4.55 | 0.14 | 37.1 | 15.4 | 202  | 80.3 | 363 | 77.3 | 704 | 130  | 11186 | 0.62 | 105  | 319 | 0.03   | 832    | -5.2 |
| -18                   | 8.54 | 0.30 | 1403 | 0.50 | bd   | 0.73 | 0.08 | 0.53 | 2.58 | 0.03 | 18.5 | 7.75 | 110  | 44.9 | 199 | 41.3 | 381 | 74.4 | 12192 | 0.35 | 46.9 | 222 | 0.01   | 799    | -4.1 |
| -19                   | 9.62 | 0.10 | 1575 | 0.93 | 0.02 | 1.05 | 0.03 | 0.54 | 2.75 | 0.02 | 21.3 | 8.47 | 125  | 48.9 | 240 | 48.3 | 456 | 86.8 | 10961 | 0.49 | 65.6 | 244 | 0.01   | 811    | -2.3 |
| -20                   | 11.6 | 0.25 | 2137 | 0.89 | 0.12 | 1.26 | 0.11 | 1.43 | 4.48 | bd   | 39.6 | 13.3 | 193  | 71.4 | 340 | 70.2 | 648 | 127  | 12459 | 0.65 | 92.1 | 404 | 0.00   | 832    | -4.9 |
| -21                   | 11.5 | 0.21 | 1631 | 0.55 | 0.01 | 0.89 | 0.09 | 1.91 | 4.22 | 0.12 | 32.1 | 11.3 | 144  | 52.6 | 241 | 49.1 | 458 | 86.9 | 11500 | 0.44 | 68.5 | 217 | 0.03   | 830    | -7.6 |
| -22                   | 8.64 | 0.18 | 1524 | 0.53 | bd   | 0.94 | 0.02 | 0.88 | 2.94 | 0.08 | 19.5 | 8.53 | 120  | 49.1 | 227 | 47.5 | 443 | 86.0 | 11488 | 0.38 | 62.5 | 221 | 0.03   | 800    | -4.5 |
| -23                   | 7.31 | 0.22 | 1251 | 0.46 | 0.01 | 0.69 | bd   | 0.77 | 2.09 | 0.04 | 14.2 | 6.68 | 94.7 | 40.0 | 189 | 40.3 | 377 | 74.5 | 11498 | 0.34 | 39.7 | 192 | 0.02   | 783    | -5.0 |

| Analysis                    | Ti   | Sr   | Y    | Nb   | La   | Ce   | Pr   | Nd   | Sm   | Eu   | Gd   | Tb   | Dy   | Ho   | Er  | Tm   | Yb  | Lu   | Hf    | Ta   | Th   | U   | Eu/Eu* | T (°C) | ΔFMQ |
|-----------------------------|------|------|------|------|------|------|------|------|------|------|------|------|------|------|-----|------|-----|------|-------|------|------|-----|--------|--------|------|
| GX35, Dasi granite porphyry |      |      |      |      |      |      |      |      |      |      |      |      |      |      |     |      |     |      |       |      |      |     |        |        |      |
| -01                         | 9.99 | 0.30 | 1889 | 0.53 | 0.01 | 0.77 | 0.03 | 1.14 | 3.21 | 0.03 | 27.7 | 10.8 | 145  | 58.1 | 281 | 56.3 | 519 | 98.8 | 11073 | 0.46 | 69.4 | 248 | 0.01   | 815    | -5.9 |
| -02                         | 8.94 | 0.10 | 2000 | 0.73 | bd   | 0.62 | 0.04 | 0.13 | 3.59 | bd   | 29.2 | 11.1 | 160  | 64.0 | 310 | 60.7 | 547 | 103  | 10650 | 0.45 | 60.6 | 225 | 0.00   | 804    | -0.8 |
| -03                         | 8.82 | 0.20 | 1901 | 0.53 | 0.01 | 0.58 | 0.03 | 0.63 | 3.65 | 0.08 | 26.0 | 11.7 | 156  | 63.2 | 297 | 59.5 | 539 | 102  | 10950 | 0.37 | 68.0 | 279 | 0.03   | 802    | -5.7 |
| -05                         | 7.79 | 0.35 | 1494 | 0.53 | bd   | 0.57 | 0.02 | 0.29 | 2.20 | 0.04 | 17.4 | 7.76 | 115  | 50.1 | 226 | 46.2 | 425 | 85.5 | 11207 | 0.57 | 52.9 | 264 | 0.02   | 789    | -2.7 |
| -06                         | 10.3 | 0.15 | 2658 | 0.68 | bd   | 1.06 | 0.05 | 2.18 | 6.84 | 0.25 | 48.5 | 16.7 | 223  | 89.3 | 390 | 76.4 | 676 | 129  | 10653 | 0.38 | 96.6 | 250 | 0.04   | 819    | -8.0 |
| -07                         | 9.21 | 0.29 | 1953 | 0.34 | bd   | 0.74 | 0.05 | 1.24 | 3.37 | 0.05 | 24.8 | 11.2 | 159  | 61.7 | 298 | 59.3 | 540 | 107  | 10589 | 0.60 | 63.4 | 234 | 0.02   | 807    | -6.4 |
| -08                         | 16.4 | 0.06 | 1505 | 0.74 | 0.07 | 1.55 | 0.05 | 1.28 | 4.92 | 0.24 | 27.2 | 12.2 | 126  | 50.5 | 223 | 43.7 | 384 | 73.6 | 9960  | 0.74 | 86.4 | 194 | 0.06   | 871    | -4.0 |
| -09                         | 5.97 | 0.19 | 2129 | 0.68 | bd   | 0.75 | 0.07 | 1.03 | 2.79 | 0.12 | 26.9 | 11.0 | 168  | 67.7 | 334 | 71.7 | 637 | 122  | 10819 | 0.86 | 69.0 | 385 | 0.04   | 763    | -6.1 |
| -10                         | 6.97 | 0.27 | 1764 | 1.09 | 2.65 | 10.3 | 0.85 | 4.04 | 4.72 | bd   | 26.3 | 11.3 | 140  | 55.7 | 275 | 55.1 | 496 | 94.5 | 10984 | 0.58 | 172  | 523 | 0.00   | 778    | -1.5 |
| -11                         | 9.37 | 0.54 | 2057 | 0.47 | bd   | 0.62 | 0.01 | 0.72 | 3.04 | 0.04 | 26.5 | 11.5 | 160  | 66.5 | 308 | 62.9 | 587 | 114  | 11194 | 0.59 | 70.5 | 260 | 0.01   | 809    | -5.1 |
| -12                         | 7.13 | 0.36 | 1760 | 9.52 | 0.02 | 12.6 | 0.05 | 1.35 | 3.01 | 0.10 | 22.6 | 10.6 | 139  | 56.4 | 273 | 58.3 | 541 | 108  | 12261 | 4.30 | 137  | 433 | 0.04   | 780    | 3.8  |
| -13                         | 8.07 | 0.15 | 1342 | 1.38 | bd   | 1.13 | 0.02 | 0.30 | 2.41 | 0.12 | 16.3 | 7.92 | 104  | 42.7 | 208 | 46.0 | 414 | 85.6 | 11357 | 0.96 | 76.6 | 338 | 0.06   | 793    | -0.4 |
| -14                         | 9.05 | 0.25 | 1672 | 0.54 | bd   | 0.73 | 0.05 | 0.79 | 3.49 | 0.06 | 23.5 | 9.51 | 130  | 54.6 | 255 | 53.7 | 497 | 95.5 | 12034 | 0.42 | 59.6 | 240 | 0.02   | 805    | -5.3 |
| -15                         | 9.15 | bd   | 2208 | 0.79 | 0.01 | 0.96 | 0.03 | 0.68 | 2.91 | 0.09 | 31.4 | 12.9 | 176  | 75.2 | 360 | 72.3 | 681 | 132  | 11447 | 0.57 | 60.2 | 269 | 0.03   | 806    | -3.1 |
| -16                         | 7.52 | 0.22 | 1732 | 1.10 | bd   | 1.85 | 0.06 | 0.75 | 3.67 | 0.06 | 26.3 | 10.7 | 142  | 58.1 | 281 | 56.2 | 511 | 97.0 | 11468 | 0.62 | 152  | 438 | 0.02   | 786    | -2.3 |
| -17                         | 8.18 | 0.19 | 1950 | 0.71 | bd   | 1.10 | 0.06 | 0.57 | 2.60 | 0.04 | 27.2 | 11.3 | 156  | 60.7 | 289 | 60.7 | 549 | 105  | 11563 | 0.69 | 98.8 | 346 | 0.01   | 794    | -2.5 |
| -18                         | 9.89 | 0.36 | 2016 | 0.49 | bd   | 0.77 | 0.06 | 0.99 | 4.14 | bd   | 26.5 | 12.0 | 156  | 64.7 | 300 | 62.0 | 557 | 110  | 10896 | 0.53 | 64.5 | 244 | 0.00   | 814    | -5.8 |
| -19                         | 8.74 | 0.27 | 898  | 1.25 | bd   | 3.91 | 0.10 | 0.46 | 1.98 | 0.22 | 14.7 | 5.68 | 71.6 | 29.3 | 130 | 28.0 | 255 | 50.3 | 9626  | 0.66 | 55.4 | 189 | 0.12   | 801    | 2.7  |
| -20                         | 13.7 | 0.33 | 2562 | 0.83 | 0.05 | 1.80 | 0.22 | 5.04 | 10.5 | 0.34 | 63.1 | 21.7 | 256  | 96.6 | 436 | 85.8 | 738 | 139  | 9820  | 0.62 | 158  | 248 | 0.04   | 850    | -8.8 |
| -21                         | 10.5 | 0.30 | 2114 | 0.56 | bd   | 0.90 | 0.06 | 1.47 | 3.39 | bd   | 33.6 | 12.8 | 176  | 71.1 | 334 | 67.8 | 612 | 117  | 10882 | 0.56 | 90.6 | 293 | 0.00   | 821    | -5.9 |
| -22                         | 3.08 | 0.29 | 1587 | 1.52 | bd   | 0.57 | bd   | 0.22 | 2.67 | 0.07 | 16.8 | 8.88 | 128  | 46.8 | 239 | 55.8 | 575 | 114  | 12341 | 1.66 | 41.1 | 584 | 0.03   | 702    | -4.0 |
| -23                         | 10.4 | 0.31 | 2013 | 0.67 | bd   | 0.90 | 0.03 | 0.51 | 3.75 | 0.06 | 27.3 | 11.8 | 155  | 63.2 | 301 | 62.0 | 559 | 106  | 10542 | 0.40 | 76.1 | 260 | 0.02   | 819    | -3.0 |
| -24                         | 9.51 | 0.29 | 1953 | 0.67 | bd   | 0.66 | 0.04 | 1.00 | 3.54 | bd   | 27.9 | 12.0 | 161  | 68.4 | 311 | 64.2 | 577 | 111  | 10446 | 0.38 | 76.8 | 256 | 0.00   | 810    | -6.1 |

| Analysis                     | Ti   | Sr   | Y    | Nb   | La   | Ce   | Pr   | Nd   | Sm   | Eu   | Gd   | Tb   | Dy   | Ho   | Er  | Tm   | Yb  | Lu   | Hf    | Ta   | Th   | U   | Eu/Eu* | T (°C) | ΔFMQ |
|------------------------------|------|------|------|------|------|------|------|------|------|------|------|------|------|------|-----|------|-----|------|-------|------|------|-----|--------|--------|------|
| GX45, Taima granite porphyry |      |      |      |      |      |      |      |      |      |      |      |      |      |      |     |      |     |      |       |      |      |     |        |        |      |
| -02                          | 7.92 | 0.03 | 1223 | 0.57 | 0.02 | 0.98 | 0.03 | 0.53 | 2.38 | 0.08 | 17.4 | 7.11 | 94.5 | 39.5 | 195 | 41.7 | 381 | 76.3 | 11290 | 0.55 | 55.9 | 271 | 0.04   | 791    | -2.8 |
| -03                          | 12.9 | 0.15 | 1778 | 0.90 | 0.02 | 1.41 | 0.03 | 1.67 | 5.33 | 0.18 | 32.7 | 12.9 | 159  | 59.5 | 265 | 51.0 | 462 | 89.0 | 10811 | 0.60 | 85.2 | 241 | 0.04   | 844    | -5.6 |
| -04                          | 10.0 | 0.24 | 2111 | 0.94 | bd   | 1.03 | 0.08 | 1.16 | 4.87 | 0.06 | 28.5 | 12.8 | 182  | 70.9 | 348 | 68.3 | 641 | 126  | 11762 | 0.53 | 99.8 | 402 | 0.01   | 815    | -5.2 |
| -05                          | 15.1 | 0.43 | 2315 | 0.82 | 0.08 | 1.61 | 0.10 | 1.82 | 5.87 | 0.12 | 42.0 | 17.0 | 216  | 81.6 | 373 | 74.6 | 680 | 126  | 10527 | 0.66 | 117  | 290 | 0.02   | 861    | -4.6 |
| -06                          | 8.98 | 0.30 | 2398 | 0.75 | bd   | 0.92 | 0.05 | 1.29 | 3.93 | 0.13 | 35.0 | 14.8 | 200  | 82.6 | 383 | 80.8 | 743 | 135  | 10517 | 0.63 | 92.1 | 326 | 0.03   | 804    | -5.7 |
| -07                          | 7.65 | 0.25 | 2070 | 0.84 | bd   | 1.36 | 0.03 | 0.76 | 3.13 | 0.07 | 29.6 | 12.2 | 166  | 69.7 | 318 | 65.1 | 636 | 116  | 10312 | 0.78 | 120  | 416 | 0.02   | 787    | -2.9 |
| -08                          | 10.2 | 0.40 | 2398 | 0.74 | 0.01 | 0.96 | 0.05 | 0.72 | 4.07 | 0.03 | 34.3 | 14.7 | 198  | 78.0 | 375 | 78.6 | 703 | 134  | 10871 | 0.51 | 90.4 | 335 | 0.01   | 818    | -3.7 |
| -09                          | 9.94 | 0.24 | 1564 | 0.67 | bd   | 0.69 | 0.03 | 1.22 | 3.08 | 0.08 | 23.8 | 9.57 | 119  | 48.8 | 254 | 54.6 | 484 | 90.4 | 11827 | 0.63 | 75.2 | 241 | 0.03   | 815    | -6.4 |
| -10                          | 9.87 | 0.33 | 1875 | 0.50 | 0.01 | 1.08 | 0.01 | 1.15 | 3.09 | 0.13 | 25.1 | 11.1 | 151  | 60.3 | 284 | 60.7 | 534 | 105  | 11564 | 0.39 | 76.6 | 302 | 0.05   | 814    | -4.4 |
| -11                          | 7.39 | 0.14 | 1689 | 0.72 | bd   | 1.08 | 0.03 | 0.83 | 2.38 | 0.03 | 21.7 | 9.91 | 137  | 53.9 | 256 | 53.5 | 492 | 93.5 | 11049 | 0.72 | 74.0 | 280 | 0.01   | 784    | -3.7 |
| -12                          | 10.4 | 0.24 | 2342 | 0.68 | 0.04 | 1.27 | 0.04 | 1.26 | 5.05 | 0.11 | 37.4 | 15.9 | 193  | 80.1 | 369 | 75.4 | 663 | 129  | 10322 | 0.56 | 127  | 362 | 0.03   | 819    | -4.9 |
| -13                          | 10.7 | 0.16 | 1998 | 0.32 | 0.02 | 1.06 | 0.09 | 1.37 | 3.94 | 0.08 | 32.3 | 13.1 | 177  | 68.3 | 310 | 63.3 | 566 | 107  | 10943 | 0.43 | 96.7 | 279 | 0.02   | 823    | -5.5 |
| -14                          | 7.33 | 0.31 | 2218 | 1.03 | bd   | 1.28 | 0.02 | 0.93 | 3.17 | 0.08 | 28.7 | 13.0 | 178  | 72.2 | 343 | 70.7 | 659 | 122  | 10721 | 0.74 | 132  | 456 | 0.02   | 783    | -3.7 |
| -15                          | 9.04 | 0.57 | 1861 | 0.61 | 0.04 | 0.83 | 0.06 | 0.79 | 3.60 | 0.02 | 24.7 | 11.4 | 154  | 59.6 | 287 | 59.6 | 540 | 103  | 11567 | 0.57 | 91.4 | 322 | 0.01   | 805    | -4.8 |
| -16                          | 11.6 | 0.23 | 1749 | 0.58 | 0.01 | 1.49 | 0.04 | 1.94 | 3.50 | 0.04 | 28.4 | 11.2 | 156  | 60.8 | 289 | 53.9 | 502 | 97.7 | 10841 | 0.49 | 97.1 | 242 | 0.01   | 832    | -4.9 |
| -17                          | 7.83 | 0.28 | 1942 | 0.75 | 0.12 | 1.88 | 0.11 | 1.12 | 4.44 | 0.08 | 30.0 | 12.3 | 153  | 62.9 | 305 | 59.7 | 543 | 103  | 10987 | 0.63 | 147  | 428 | 0.02   | 790    | -3.7 |
| -18                          | 10.1 | 0.28 | 2391 | 1.28 | bd   | 1.15 | 0.04 | 1.60 | 4.24 | 0.13 | 40.4 | 16.1 | 217  | 89.0 | 419 | 85.1 | 765 | 142  | 10655 | 0.61 | 124  | 389 | 0.03   | 816    | -5.5 |
| -19                          | 9.70 | 0.19 | 1898 | 0.61 | bd   | 0.82 | 0.07 | 1.00 | 3.96 | 0.16 | 29.0 | 12.2 | 166  | 65.6 | 314 | 62.4 | 566 | 113  | 10744 | 0.46 | 77.9 | 270 | 0.04   | 812    | -5.6 |
| -20                          | 7.95 | 0.21 | 1831 | 0.74 | bd   | 1.18 | 0.05 | 0.75 | 2.69 | 0.05 | 26.6 | 11.0 | 146  | 60.2 | 273 | 56.3 | 517 | 99.3 | 11073 | 0.60 | 130  | 400 | 0.02   | 791    | -3.3 |
| -21                          | 6.70 | 0.40 | 2512 | 0.90 | bd   | 0.69 | 0.03 | 0.97 | 3.91 | bd   | 31.8 | 15.1 | 222  | 92.1 | 448 | 93.4 | 849 | 164  | 10849 | 0.78 | 101  | 527 | 0.00   | 774    | -6.2 |
| -22                          | 9.38 | 0.25 | 1781 | 0.91 | bd   | 0.76 | 0.04 | 0.60 | 4.07 | 0.07 | 26.0 | 10.9 | 146  | 58.7 | 278 | 57.8 | 525 | 101  | 11374 | 0.45 | 76.9 | 292 | 0.02   | 809    | -4.6 |
| -23                          | 8.05 | 0.30 | 2436 | 1.05 | 0.01 | 0.97 | 0.06 | 0.99 | 3.91 | 0.04 | 37.4 | 15.9 | 216  | 91.5 | 423 | 86.4 | 806 | 154  | 10915 | 0.59 | 111  | 446 | 0.01   | 793    | -4.9 |
| -24                          | 8.69 | 0.39 | 2492 | 1.24 | 0.07 | 0.91 | 0.03 | 0.78 | 3.12 | 0.04 | 27.6 | 14.0 | 204  | 86.2 | 438 | 95.4 | 889 | 171  | 11754 | 0.96 | 77.1 | 604 | 0.01   | 801    | -3.2 |

Note: bd = below detection limit.

Table S3 Zircon Lu-Hf isotopic compositions of rocks from the Qinzhou Bay Granitic Complex

| Analysis                    | Age<br>(Ma) | $^{176}\text{Hf}/^{177}\text{Hf}$ | $1\sigma$ | $^{176}\text{Lu}/^{177}\text{Hf}$ | $^{176}\text{Yb}/^{177}\text{Hf}$ | $(^{176}\text{Hf}/^{177}\text{Hf})_i$ | $\varepsilon_{\text{Hf}}(t)$ | $1\sigma$ | $T_{\text{DM}}$<br>(Ga) | $T_{\text{DM2}}$<br>(Ga) |
|-----------------------------|-------------|-----------------------------------|-----------|-----------------------------------|-----------------------------------|---------------------------------------|------------------------------|-----------|-------------------------|--------------------------|
| GX25, Jiuzhou granites      |             |                                   |           |                                   |                                   |                                       |                              |           |                         |                          |
| -01                         | 247.4       | 0.282301                          | 0.000012  | 0.001436                          | 0.03819                           | 0.282294                              | -11.9                        | 0.4       | 1.36                    | 2.00                     |
| -02                         | 247.4       | 0.282256                          | 0.000014  | 0.001129                          | 0.02819                           | 0.282250                              | -13.4                        | 0.5       | 1.41                    | 2.10                     |
| -03                         | 247.4       | 0.282353                          | 0.000012  | 0.001493                          | 0.03944                           | 0.282346                              | -10.0                        | 0.4       | 1.29                    | 1.88                     |
| -04                         | 247.4       | 0.282358                          | 0.000011  | 0.001853                          | 0.04934                           | 0.282350                              | -9.9                         | 0.4       | 1.29                    | 1.88                     |
| -05                         | 247.4       | 0.282410                          | 0.000012  | 0.001507                          | 0.04083                           | 0.282403                              | -8.0                         | 0.4       | 1.21                    | 1.76                     |
| -06                         | 247.4       | 0.282325                          | 0.000012  | 0.001179                          | 0.03166                           | 0.282320                              | -10.9                        | 0.4       | 1.31                    | 1.94                     |
| -07                         | 247.4       | 0.282278                          | 0.000011  | 0.001512                          | 0.04065                           | 0.282271                              | -12.7                        | 0.4       | 1.39                    | 2.05                     |
| -08                         | 247.4       | 0.282086                          | 0.000011  | 0.000606                          | 0.01616                           | 0.282083                              | -19.3                        | 0.4       | 1.62                    | 2.46                     |
| -09                         | 247.4       | 0.282379                          | 0.000013  | 0.000994                          | 0.02646                           | 0.282374                              | -9.0                         | 0.4       | 1.23                    | 1.82                     |
| -10                         | 247.4       | 0.282287                          | 0.000010  | 0.001288                          | 0.03377                           | 0.282281                              | -12.3                        | 0.4       | 1.37                    | 2.03                     |
| -11                         | 247.4       | 0.282368                          | 0.000012  | 0.001376                          | 0.03712                           | 0.282362                              | -9.5                         | 0.4       | 1.26                    | 1.85                     |
| -12                         | 247.4       | 0.282312                          | 0.000011  | 0.001196                          | 0.03146                           | 0.282307                              | -11.4                        | 0.4       | 1.33                    | 1.97                     |
| -13                         | 247.4       | 0.282367                          | 0.000012  | 0.001258                          | 0.03390                           | 0.282361                              | -9.5                         | 0.4       | 1.26                    | 1.85                     |
| -14                         | 247.4       | 0.282297                          | 0.000011  | 0.001615                          | 0.04337                           | 0.282290                              | -12.0                        | 0.4       | 1.37                    | 2.01                     |
| -15                         | 247.4       | 0.282373                          | 0.000011  | 0.001114                          | 0.02953                           | 0.282367                              | -9.3                         | 0.4       | 1.25                    | 1.84                     |
| -16                         | 247.4       | 0.282355                          | 0.000011  | 0.001593                          | 0.04249                           | 0.282348                              | -10.0                        | 0.4       | 1.29                    | 1.88                     |
| -17                         | 247.4       | 0.282362                          | 0.000011  | 0.001996                          | 0.05427                           | 0.282353                              | -9.8                         | 0.4       | 1.29                    | 1.87                     |
| -18                         | 247.4       | 0.282297                          | 0.000012  | 0.000068                          | 0.00210                           | 0.282297                              | -11.8                        | 0.4       | 1.31                    | 1.99                     |
| -19                         | 356         | 0.282124                          | 0.000013  | 0.000801                          | 0.02042                           | 0.282118                              | -15.7                        | 0.5       | 1.58                    | 2.32                     |
| -20                         | 247.4       | 0.282378                          | 0.000010  | 0.001553                          | 0.04245                           | 0.282371                              | -9.2                         | 0.4       | 1.25                    | 1.83                     |
| -21                         | 247.4       | 0.282324                          | 0.000011  | 0.001008                          | 0.02639                           | 0.282319                              | -11.0                        | 0.4       | 1.31                    | 1.94                     |
| -22                         | 247.4       | 0.282350                          | 0.000010  | 0.001077                          | 0.02833                           | 0.282345                              | -10.1                        | 0.3       | 1.28                    | 1.89                     |
| -23                         | 247.4       | 0.282350                          | 0.000011  | 0.001261                          | 0.03459                           | 0.282344                              | -10.1                        | 0.4       | 1.28                    | 1.89                     |
| -24                         | 247.4       | 0.282349                          | 0.000010  | 0.001219                          | 0.03332                           | 0.282343                              | -10.1                        | 0.4       | 1.28                    | 1.89                     |
| GX35, Dasi granite porphyry |             |                                   |           |                                   |                                   |                                       |                              |           |                         |                          |
| -01                         | 246.6       | 0.282353                          | 0.000011  | 0.001108                          | 0.02815                           | 0.282348                              | -10.0                        | 0.4       | 1.27                    | 1.88                     |
| -02                         | 246.6       | 0.282351                          | 0.000013  | 0.001336                          | 0.03558                           | 0.282345                              | -10.1                        | 0.5       | 1.28                    | 1.89                     |
| -03                         | 246.6       | 0.282399                          | 0.000011  | 0.001082                          | 0.02933                           | 0.282394                              | -8.4                         | 0.4       | 1.21                    | 1.78                     |
| -04                         | 246.6       | 0.282346                          | 0.000013  | 0.000737                          | 0.01970                           | 0.282343                              | -10.2                        | 0.5       | 1.27                    | 1.89                     |
| -05                         | 246.6       | 0.282369                          | 0.000013  | 0.001665                          | 0.04567                           | 0.282361                              | -9.5                         | 0.4       | 1.27                    | 1.85                     |
| -06                         | 246.6       | 0.282308                          | 0.000013  | 0.001756                          | 0.04765                           | 0.282300                              | -11.7                        | 0.5       | 1.36                    | 1.99                     |
| -07                         | 246.6       | 0.282382                          | 0.000012  | 0.001418                          | 0.03837                           | 0.282375                              | -9.0                         | 0.4       | 1.24                    | 1.82                     |
| -08                         | 246.6       | 0.282269                          | 0.000015  | 0.001041                          | 0.02806                           | 0.282264                              | -12.9                        | 0.5       | 1.39                    | 2.07                     |
| -09                         | 246.6       | 0.282343                          | 0.000011  | 0.001519                          | 0.04120                           | 0.282336                              | -10.4                        | 0.4       | 1.30                    | 1.91                     |
| -10                         | 246.6       | 0.282336                          | 0.000013  | 0.001206                          | 0.03285                           | 0.282331                              | -10.6                        | 0.5       | 1.30                    | 1.92                     |
| -11                         | 246.6       | 0.282409                          | 0.000012  | 0.001451                          | 0.03897                           | 0.282402                              | -8.0                         | 0.4       | 1.21                    | 1.76                     |
| -12                         | 694         | 0.282405                          | 0.000010  | 0.001790                          | 0.04854                           | 0.282382                              | 1.2                          | 0.3       | 1.22                    | 1.53                     |
| -13                         | 536         | 0.282312                          | 0.000011  | 0.001403                          | 0.03592                           | 0.282298                              | -5.3                         | 0.4       | 1.34                    | 1.82                     |
| -14                         | 246.6       | 0.282371                          | 0.000016  | 0.001434                          | 0.03921                           | 0.282365                              | -9.4                         | 0.6       | 1.26                    | 1.84                     |
| -15                         | 246.6       | 0.282323                          | 0.000012  | 0.001867                          | 0.05046                           | 0.282314                              | -11.2                        | 0.4       | 1.34                    | 1.96                     |

| Analysis                     | Age<br>(Ma) | $^{176}\text{Hf}/^{177}\text{Hf}$ | 1 $\sigma$ | $^{176}\text{Lu}/^{177}\text{Hf}$ | $^{176}\text{Yb}/^{177}\text{Hf}$ | $(^{176}\text{Hf}/^{177}\text{Hf})_i$ | $\varepsilon_{\text{Hf}}(t)$ | 1 $\sigma$ | $T_{\text{DM}}$<br>(Ga) | $T_{\text{DM2}}$<br>(Ga) |
|------------------------------|-------------|-----------------------------------|------------|-----------------------------------|-----------------------------------|---------------------------------------|------------------------------|------------|-------------------------|--------------------------|
| -16                          | 246.6       | 0.281955                          | 0.000021   | 0.000322                          | 0.00892                           | 0.281954                              | -23.9                        | 0.7        | 1.79                    | 2.75                     |
| -17                          | 246.6       | 0.282399                          | 0.000012   | 0.001165                          | 0.03142                           | 0.282394                              | -8.4                         | 0.4        | 1.21                    | 1.78                     |
| -18                          | 246.6       | 0.282356                          | 0.000012   | 0.001299                          | 0.03484                           | 0.282350                              | -9.9                         | 0.4        | 1.27                    | 1.88                     |
| -19                          | 451         | 0.282134                          | 0.000011   | 0.000799                          | 0.02151                           | 0.282127                              | -13.2                        | 0.4        | 1.57                    | 2.25                     |
| -20                          | 246.6       | 0.282310                          | 0.000011   | 0.001424                          | 0.03849                           | 0.282303                              | -11.6                        | 0.4        | 1.34                    | 1.98                     |
| -21                          | 246.6       | 0.282377                          | 0.000016   | 0.001546                          | 0.04271                           | 0.282370                              | -9.2                         | 0.5        | 1.25                    | 1.83                     |
| -22                          | 246.6       | 0.282416                          | 0.000011   | 0.001176                          | 0.03206                           | 0.282411                              | -7.8                         | 0.4        | 1.19                    | 1.74                     |
| -23                          | 246.6       | 0.281992                          | 0.000017   | 0.000678                          | 0.01849                           | 0.281989                              | -22.7                        | 0.6        | 1.76                    | 2.67                     |
| -24                          | 246.6       | 0.282361                          | 0.000011   | 0.001497                          | 0.04115                           | 0.282354                              | -9.8                         | 0.4        | 1.28                    | 1.87                     |
| GX45, Taima granite porphyry |             |                                   |            |                                   |                                   |                                       |                              |            |                         |                          |
| -01                          | 248.32      | 0.282381                          | 0.000013   | 0.001072                          | 0.02890                           | 0.282376                              | -8.9                         | 0.4        | 1.23                    | 1.82                     |
| -02                          | 248.32      | 0.282378                          | 0.000013   | 0.001143                          | 0.03091                           | 0.282373                              | -9.1                         | 0.5        | 1.24                    | 1.82                     |
| -03                          | 248.32      | 0.282109                          | 0.000023   | 0.000911                          | 0.02446                           | 0.282105                              | -18.5                        | 0.8        | 1.61                    | 2.42                     |
| -04                          | 248.32      | 0.282305                          | 0.000012   | 0.000987                          | 0.02674                           | 0.282300                              | -11.6                        | 0.4        | 1.34                    | 1.99                     |
| -05                          | 248.32      | 0.282361                          | 0.000014   | 0.002147                          | 0.05713                           | 0.282351                              | -9.8                         | 0.5        | 1.30                    | 1.87                     |
| -06                          | 248.32      | 0.282319                          | 0.000011   | 0.001681                          | 0.04578                           | 0.282311                              | -11.2                        | 0.4        | 1.34                    | 1.96                     |
| -07                          | 248.32      | 0.282368                          | 0.000011   | 0.001339                          | 0.03672                           | 0.282362                              | -9.4                         | 0.4        | 1.26                    | 1.85                     |
| -08                          | 248.32      | 0.282407                          | 0.000013   | 0.001823                          | 0.04997                           | 0.282398                              | -8.2                         | 0.4        | 1.22                    | 1.77                     |
| -09                          | 248.32      | 0.282348                          | 0.000011   | 0.001311                          | 0.03550                           | 0.282342                              | -10.1                        | 0.4        | 1.29                    | 1.89                     |
| -10                          | 248.32      | 0.282360                          | 0.000011   | 0.001483                          | 0.04002                           | 0.282353                              | -9.8                         | 0.4        | 1.28                    | 1.87                     |
| -11                          | 248.32      | 0.282381                          | 0.000011   | 0.001150                          | 0.03129                           | 0.282376                              | -9.0                         | 0.4        | 1.23                    | 1.82                     |
| -12                          | 248.32      | 0.282370                          | 0.000013   | 0.001038                          | 0.02824                           | 0.282365                              | -9.3                         | 0.4        | 1.25                    | 1.84                     |
| -13                          | 248.32      | 0.282397                          | 0.000012   | 0.001525                          | 0.04135                           | 0.282390                              | -8.5                         | 0.4        | 1.22                    | 1.79                     |
| -14                          | 248.32      | 0.282356                          | 0.000010   | 0.001352                          | 0.03709                           | 0.282350                              | -9.9                         | 0.4        | 1.28                    | 1.88                     |
| -15                          | 248.32      | 0.282346                          | 0.000012   | 0.001416                          | 0.03929                           | 0.282340                              | -10.2                        | 0.4        | 1.29                    | 1.90                     |
| -16                          | 248.32      | 0.282359                          | 0.000011   | 0.001404                          | 0.03940                           | 0.282353                              | -9.8                         | 0.4        | 1.27                    | 1.87                     |
| -17                          | 248.32      | 0.282344                          | 0.000012   | 0.001234                          | 0.03493                           | 0.282338                              | -10.3                        | 0.4        | 1.29                    | 1.90                     |
| -18                          | 248.32      | 0.282368                          | 0.000012   | 0.001927                          | 0.05371                           | 0.282360                              | -9.5                         | 0.4        | 1.28                    | 1.85                     |
| -19                          | 248.32      | 0.282077                          | 0.000014   | 0.000714                          | 0.01872                           | 0.282073                              | -19.7                        | 0.5        | 1.64                    | 2.49                     |
| -20                          | 248.32      | 0.282391                          | 0.000012   | 0.001442                          | 0.04050                           | 0.282384                              | -8.6                         | 0.4        | 1.23                    | 1.80                     |
| -21                          | 248.32      | 0.282388                          | 0.000011   | 0.002007                          | 0.05708                           | 0.282379                              | -8.9                         | 0.4        | 1.25                    | 1.81                     |
| -22                          | 248.32      | 0.282337                          | 0.000012   | 0.001546                          | 0.04336                           | 0.282330                              | -10.6                        | 0.4        | 1.31                    | 1.92                     |
| -23                          | 248.32      | 0.282385                          | 0.000010   | 0.001965                          | 0.05487                           | 0.282376                              | -9.0                         | 0.4        | 1.26                    | 1.82                     |
| -24                          | 248.32      | 0.282288                          | 0.000011   | 0.001938                          | 0.05378                           | 0.282279                              | -12.4                        | 0.4        | 1.40                    | 2.03                     |
